# Supplementary material for: Effect of structural stability on endolysosomal degradation and T‐cell reactivity of major shrimp allergen tropomyosin
Source: PubMed Central journal article supplement (PMC7687109; doi:10.1111/all.14410), 2020-06-18

## Supplementary figure S2:

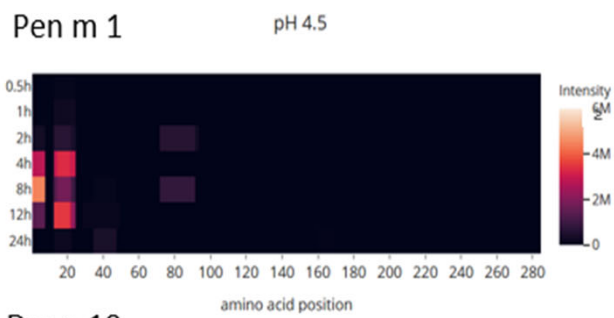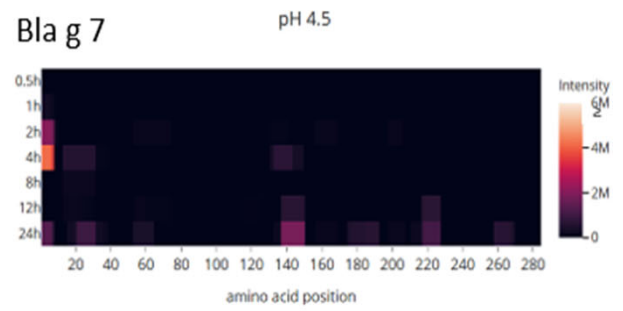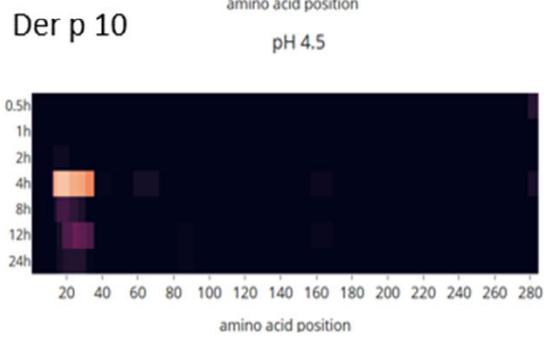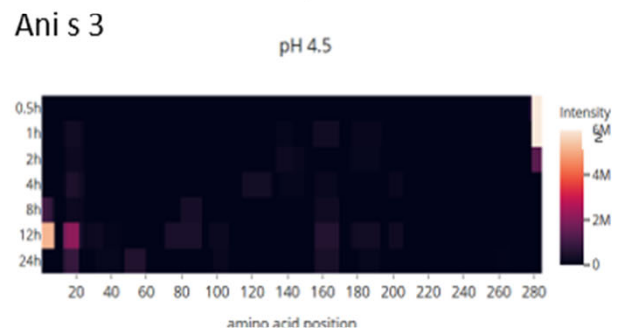

Supplement: ALL-75-2909-s002.pdf [file ALL-75-2909-s002.pdf]
